# Supplementary material for: Chemical routes to GeS2 and GeSe2 nanowires
Source: Royal Society of Chemistry journal article supplement (doi:10.1039/b412056f), 2004-01-01
Supplement: b412056f.pdf [file b412056f.pdf]

## Supplementary information

### Chemical routes to GeS<sub>2</sub> and GeSe<sub>2</sub> nanowires

Manashi Nath, Amitava Choudhury and C. N. R. Rao<sup>\*</sup>

**Synthesis of [C<sub>6</sub>H<sub>14</sub>NH<sub>2</sub>]<sub>4</sub>Ge<sub>2</sub>Se<sub>6</sub>]:** In a typical synthesis, 158.7 mg (~2mM) of metallic Se was added to 9.5 ml of di-propylamine and stirred for ~1 h. 72.8 mg (~1mM) of metallic Ge was added to this solution and the entire reaction mixture was transferred to a 23ml acid-digestion bomb and sealed in an autoclave, which was then heated to 180°C for 5d. The autoclave was then cooled to room temperature and the bright yellow crystals of [C<sub>6</sub>H<sub>14</sub>NH<sub>2</sub>]<sub>4</sub>[Ge<sub>2</sub>Se<sub>6</sub>] were filtered and dried under vacuum. It should be noted that the product was extremely moisture and air-sensitive and readily decomposed to Se on exposure to atmosphere for several hours. The product was stored in a dessicator under Ar atmosphere.

### Characterization of [C<sub>6</sub>H<sub>14</sub>NH<sub>2</sub>]<sub>4</sub>[Ge<sub>2</sub>Se<sub>6</sub>]:

**Single Crystal X-ray Structure Determination:** A suitable single crystal of the compound was selected under a polarizing microscope and glued to a thin glass fiber with cyanoacrylate (super glue) adhesive. Single crystal structure determination by X-ray diffraction was performed with a Siemens smart – CCD diffractometer equipped with a normal focus, 2.4 kW sealed tube X-ray source (Mo K $\alpha$  radiation,  $\lambda$ =0.71073 Å) operating at 50 kV and 40 mA. The structure was solved by direct methods using SHELXS-86 [G. M. Sheldrick, SHELXS-86 Program for Crystal Structure Determination, University of Gottingen, Gottingen, Germany, (1986)], which readily established the heavy atom positions (Ge and Se) and facilitated the identification of the light atoms (C, N) from difference Fourier maps. All the hydrogen positions were initially observed in the difference Fourier maps, but for the final refinement the hydrogen atoms of the amine were placed geometrically and held in the riding mode. The last cycle of refinement included atomic positions for all the atoms, anisotropic thermal parameters for all the non- hydrogen atoms and isotropic thermal parameters for all the hydrogen atoms. Full-matrix-least-squares structure refinement against |F<sup>2</sup>| was carried out using SHELXTL-PLUS package of programs [G. M. Sheldrick, SHELXS-93 Program for Crystal Structure Solution and Refinement, University of Gottingen, Gottingen, Germany (1993)]. The final crystallographic parameters can be found in the CIF file.

**Powder X-ray Diffraction (PXRD):** The purity of the bulk product (the yellow crystalline solid) was determined by experimental PXRD which is in good agreement with the simulated powder pattern generated by using the coordinates of single crystal data.

**IR, CHN and Thermogravimetric Analysis:** IR spectrum shows broad bands in the region  $3300\text{--}3500\text{cm}^{-1}$  ( $\text{--N--H}$  stretching of the secondary amine),  $2700\text{--}2900$  and  $1400\text{--}1650\text{cm}^{-1}$  (the stretching and bending modes of  $\text{--CH}_2\text{--}$  group), and weak bands in the region  $950\text{--}1150\text{cm}^{-1}$  ( $\text{--C--N}$  stretching).  $\text{C,H,N}$  analysis: C (18.81%) H (4.26%) and N (2.82%). The relative amount of the amine calculated from the  $\text{C,H,N}$  data was lower than the composition  $[\text{C}_6\text{H}_{14}\text{NH}_2]_4[\text{Ge}_2\text{Se}_6]$  obtained from single crystal data. This may be due to the decomposition of the compound on longer exposure to air/atmosphere. The TGA analysis shows two steps at  $\sim 150^\circ\text{C}$  and  $\sim 450^\circ\text{C}$  accounting for a total loss of  $\sim 46.8\%$ , presumably due to the loss of amine and the Se.

**Structure description:**  $[\text{C}_6\text{H}_{14}\text{NH}_2]_4[\text{Ge}_2\text{Se}_6]$  crystallized in a monoclinic  $\text{P2}_1/\text{c}$  space group with  $a=10.8528(8)\text{\AA}$ ,  $b=18.3953(14)\text{\AA}$ ,  $c=10.9941(8)\text{\AA}$  and  $\beta=103.425^\circ$ . The crystal structure of  $[(\text{C}_3\text{H}_7)_2\text{NH}_2][\text{Ge}_2\text{Se}_6]$  consists of isolated cations (dipropylammonium ions) and  $[\text{Ge}_2\text{Se}_6]^{4-}$  anion, which is an edge-shared dimer of  $\text{GeSe}_4$  tetrahedra (Fig. S1). There is evidence of weak  $\text{Se}\cdots\text{H--N}$  ( $\text{Se}\cdots\text{H} = 2.492(9) - 2.449(9)$ ) interaction between the cations and anions, other than van der Waals and ionic attraction in the 3D crystalline assembly.

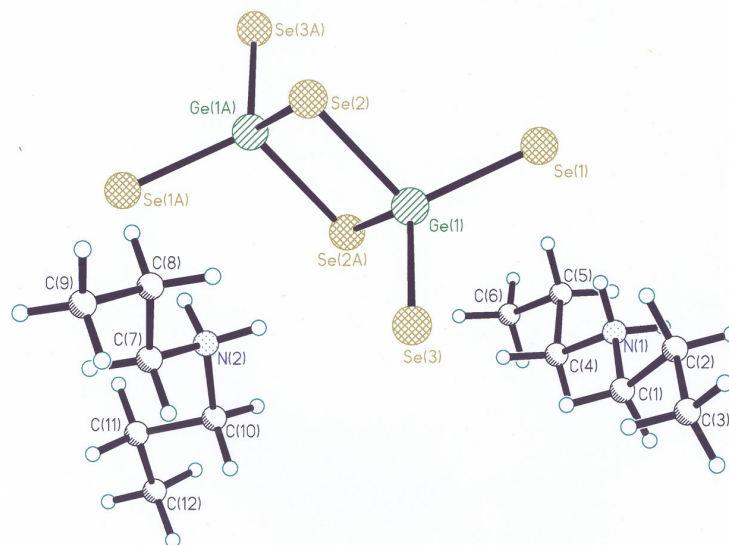

**Fig. S1:** The structure of the molecular precursor  $[\text{C}_6\text{H}_{14}\text{NH}_2][\text{Ge}_2\text{Se}_6]$  showing the  $[\text{Ge}_2\text{Se}_6]$  dimer and the amine.
